# Supplementary material for: Conversion of methanol to olefins over Al-rich ZSM-5 modified with alkaline earth metal oxides
Source: Royal Society of Chemistry journal article supplement (doi:10.1039/c6cy00867d), 2016-01-01
Supplement: c6cy00867d1.pdf [file c6cy00867d1.pdf]

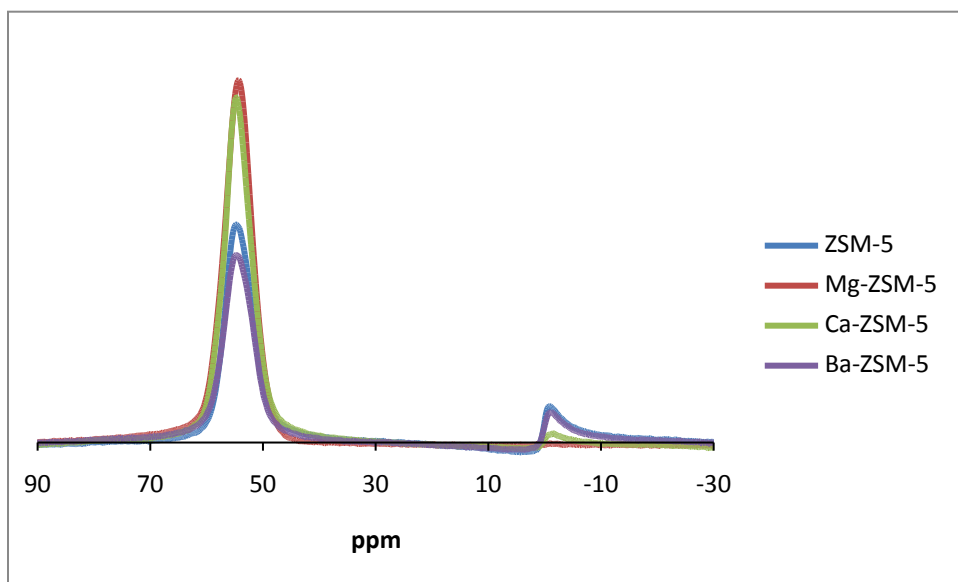

Figure S1. Overlay Al-NMR plot of parent and metal modified ZSM-5 zeolites.

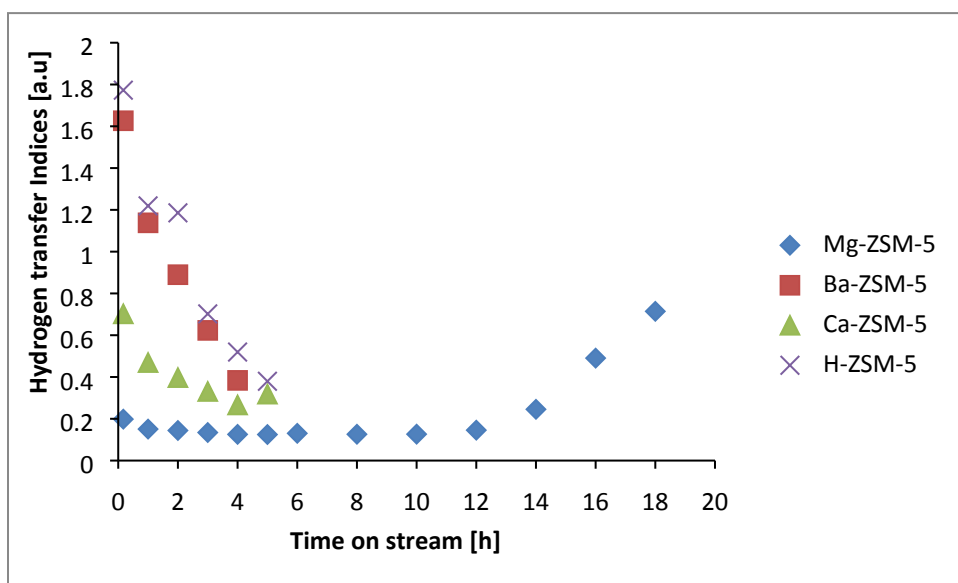

Figure S2. Plot of HTI versus catalyst TOS.

Table S1. Textural property of CTAB partially blocked and parent ZSM-5 zeolite

| Sample       | $S_{\text{BET}}$<br>[m <sup>2</sup> /g] | $S_{\text{EXT}}$<br>[m <sup>2</sup> /g] | $S_{\text{Micro}}$<br>[m <sup>2</sup> /g] | $S_{\text{Meso}}$<br>[m <sup>2</sup> /g] | $V_{\text{T}}$<br>[cm <sup>3</sup> /g] | $V_{\text{Micro}}$<br>[cm <sup>3</sup> /g] | $V_{\text{Meso}}$<br>[cm <sup>3</sup> /g] |
|--------------|-----------------------------------------|-----------------------------------------|-------------------------------------------|------------------------------------------|----------------------------------------|--------------------------------------------|-------------------------------------------|
| H-ZSM-5      | 333                                     | 95                                      | 238                                       | 143                                      | 0.177                                  | 0.099                                      | 0.078                                     |
| H-ZSM-5-CTAB | 44                                      | 14                                      | 30                                        | 14                                       | 0.036                                  | 0.013                                      | 0.023                                     |

$S_{\text{BET}}$  = BET surface area;  $S_{\text{EXT}}$  = external surface area;  $S_{\text{Micro}}$  = micropore surface area;  $V_{\text{T}}$  = Total pore volume;  $S_{\text{Meso}}$  = Mesopore volume ( $S_{\text{BET}} - S_{\text{Micro}}$ );  $V_{\text{Micro}}$  = Micropore volume;  $V_{\text{Meso}}$  = Mesopore volume ( $V_{\text{T}} - V_{\text{Micro}}$ )

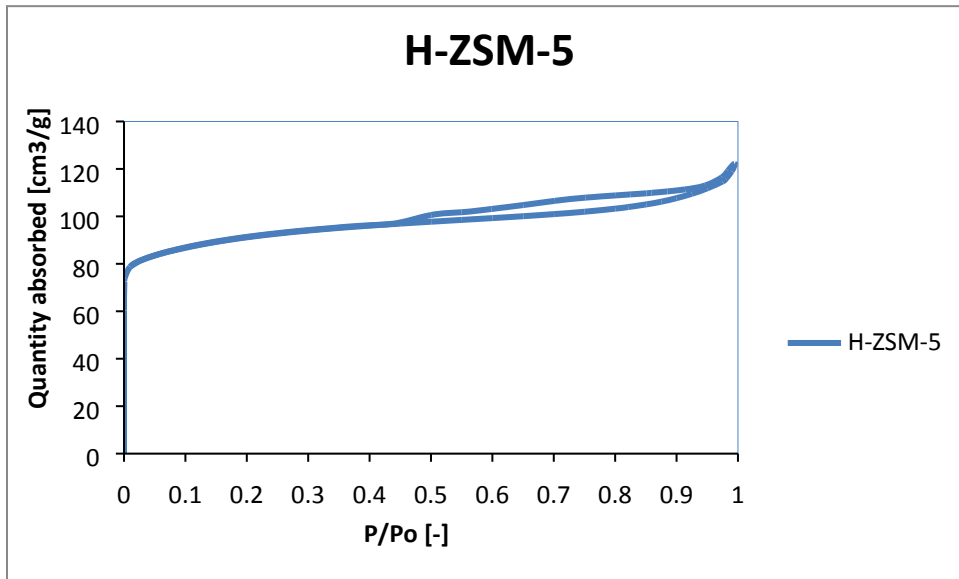

Figure S3. N<sub>2</sub> sorption isotherm of H-ZSM-5 zeolite.

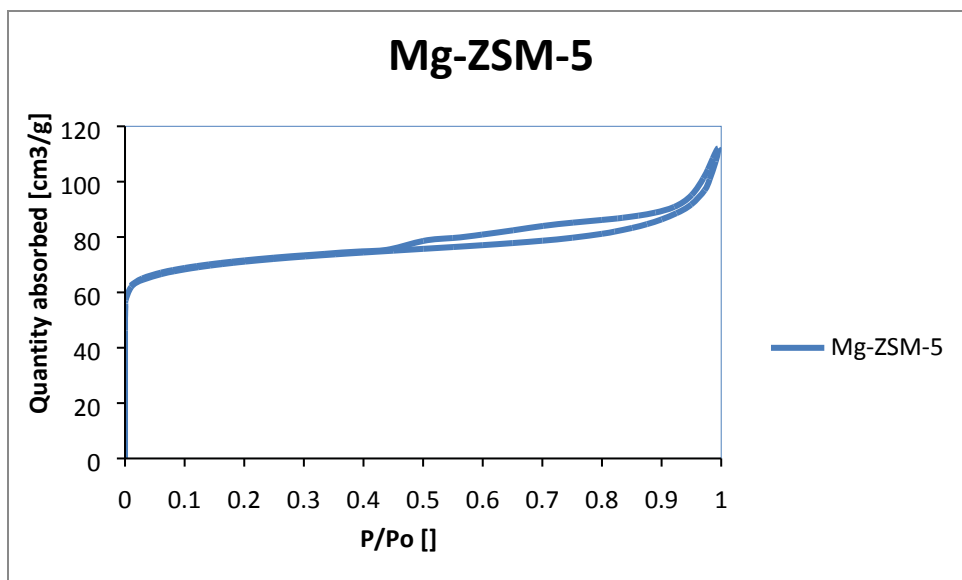

Figure S4. N<sub>2</sub> sorption isotherm of Mg-ZSM-5 zeolite.

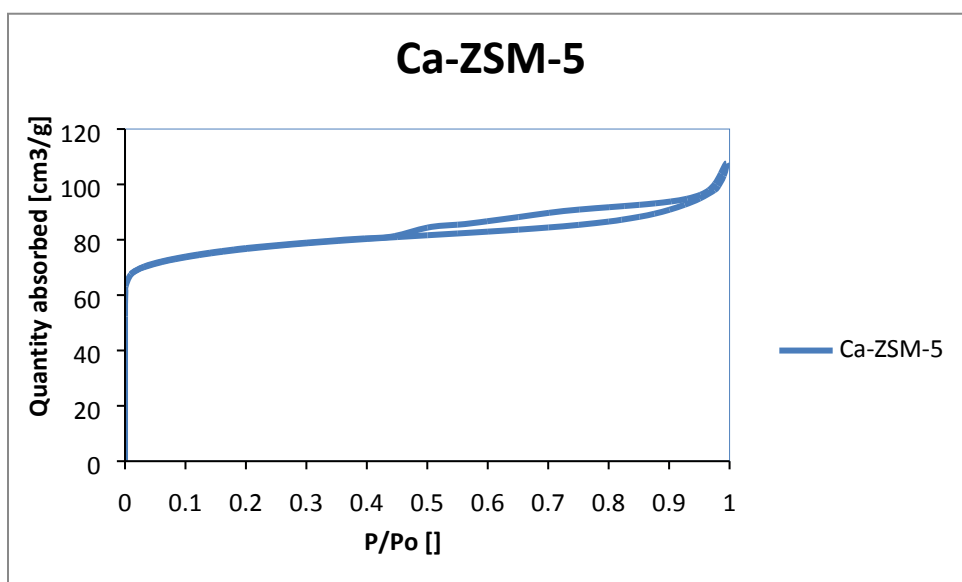

Figure S5. N<sub>2</sub> sorption isotherm of Ca-ZSM-5 zeolite.

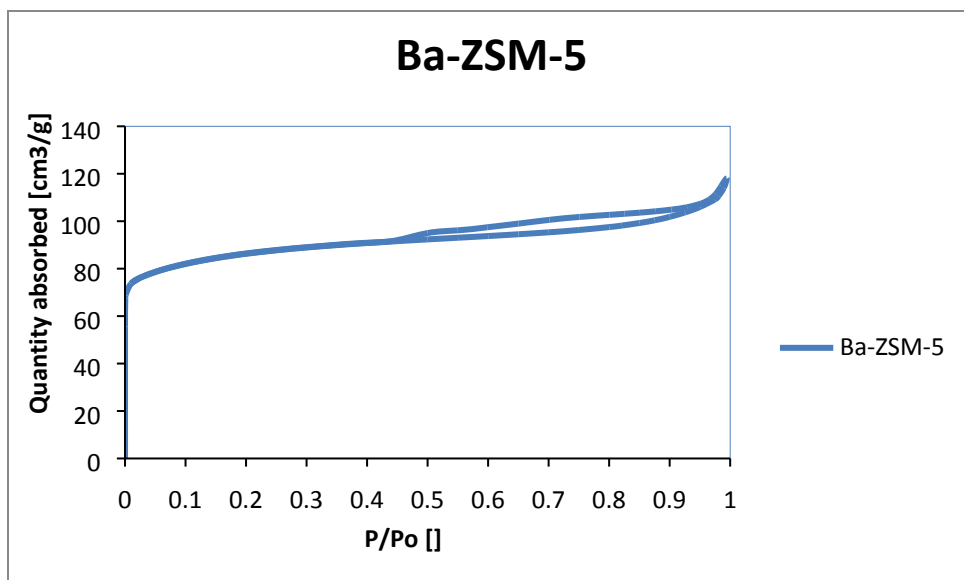

Figure S6. N<sub>2</sub> sorption isotherm of Ba-ZSM-5 zeolite.
